# Supplementary material for: Outcomes of a novel office-based opioid treatment program in an internal medicine resident continuity practice
Source: Springer Nature journal article supplement (doi:10.1186/s13722-019-0175-z), 2019-12-01
Supplement: MOESM1 [file 17642676]

# Buprenorphine Pilot Resident Assessment

Your completion of this survey or questionnaire will serve as your consent to be in this research study.

## 1. What is your current level of training?

Mark only one oval.

- PGY1
- PGY2
- PGY3
- Other: \_\_\_\_\_

## 2. What is your gender?

Mark only one oval.

- Male
- Female
- Other: \_\_\_\_\_

## 3. Residency track

Mark only one oval.

- Categorical
- GIM

## 4. If you are a GIM PGY2 or 3, what is your second site clinic?

Mark only one oval.

- CCP
- JHCP - White Marsh
- JHCP - Wyman Park/Remington
- JHCP - Dundalk

## 5. I have prescribed buprenorphine to patients in a primary care setting.

Mark only one oval.

- Yes
- No

6. **Opioid use disorder is characterized by the compulsive use of opioids despite adverse consequences from continued use and physical dependence on opioids. I provide primary care to at least one patient with opioid use disorder.**

Mark only one oval.

- Yes
- No
- I don't know

7. **I feel comfortable identifying opioid use disorder in patients I see at RBMG.**

Mark only one oval.

|                   |                       |                       |                       |                       |                       |                |
|-------------------|-----------------------|-----------------------|-----------------------|-----------------------|-----------------------|----------------|
|                   | 1                     | 2                     | 3                     | 4                     | 5                     |                |
| Strongly disagree | <input type="radio"/> | <input type="radio"/> | <input type="radio"/> | <input type="radio"/> | <input type="radio"/> | Strongly agree |

8. **I feel comfortable providing outpatient care to patients with opioid use disorder.**

Mark only one oval.

|                   |                       |                       |                       |                       |                       |                |
|-------------------|-----------------------|-----------------------|-----------------------|-----------------------|-----------------------|----------------|
|                   | 1                     | 2                     | 3                     | 4                     | 5                     |                |
| Strongly disagree | <input type="radio"/> | <input type="radio"/> | <input type="radio"/> | <input type="radio"/> | <input type="radio"/> | Strongly agree |

9. **Buprenorphine (Suboxone) treatment is an appropriate part of primary care practice for patients with opioid use disorder.**

Mark only one oval.

|                   |                       |                       |                       |                       |                       |                |
|-------------------|-----------------------|-----------------------|-----------------------|-----------------------|-----------------------|----------------|
|                   | 1                     | 2                     | 3                     | 4                     | 5                     |                |
| Strongly disagree | <input type="radio"/> | <input type="radio"/> | <input type="radio"/> | <input type="radio"/> | <input type="radio"/> | Strongly agree |

10. **Without on-site formal drug counseling, office-based buprenorphine treatment is ineffective.**

Mark only one oval.

|                   |                       |                       |                       |                       |                       |                |
|-------------------|-----------------------|-----------------------|-----------------------|-----------------------|-----------------------|----------------|
|                   | 1                     | 2                     | 3                     | 4                     | 5                     |                |
| Strongly disagree | <input type="radio"/> | <input type="radio"/> | <input type="radio"/> | <input type="radio"/> | <input type="radio"/> | Strongly agree |

11. **Abstinence from opioids (including buprenorphine) is the principal goal of treatment for opioid use disorder.**

Mark only one oval.

|                   |                       |                       |                       |                       |                       |                |
|-------------------|-----------------------|-----------------------|-----------------------|-----------------------|-----------------------|----------------|
|                   | 1                     | 2                     | 3                     | 4                     | 5                     |                |
| Strongly disagree | <input type="radio"/> | <input type="radio"/> | <input type="radio"/> | <input type="radio"/> | <input type="radio"/> | Strongly agree |

12. **Patients with opioid use disorder who inject heroin should be treated in a more closely monitored setting than patients who use oral prescription opioids.**

Mark only one oval.

|                   |                       |                       |                       |                       |                       |                |
|-------------------|-----------------------|-----------------------|-----------------------|-----------------------|-----------------------|----------------|
|                   | 1                     | 2                     | 3                     | 4                     | 5                     |                |
| Strongly disagree | <input type="radio"/> | <input type="radio"/> | <input type="radio"/> | <input type="radio"/> | <input type="radio"/> | Strongly agree |

13. **Methadone maintenance is a more effective treatment option than buprenorphine for patients with opioid use disorder.**

Mark only one oval.

|                   |                       |                       |                       |                       |                       |                |
|-------------------|-----------------------|-----------------------|-----------------------|-----------------------|-----------------------|----------------|
|                   | 1                     | 2                     | 3                     | 4                     | 5                     |                |
| Strongly disagree | <input type="radio"/> | <input type="radio"/> | <input type="radio"/> | <input type="radio"/> | <input type="radio"/> | Strongly agree |

14. **In practices that start prescribing buprenorphine, the clinic's patient population changes significantly.**

Mark only one oval.

|                   |                       |                       |                       |                       |                       |                |
|-------------------|-----------------------|-----------------------|-----------------------|-----------------------|-----------------------|----------------|
|                   | 1                     | 2                     | 3                     | 4                     | 5                     |                |
| Strongly disagree | <input type="radio"/> | <input type="radio"/> | <input type="radio"/> | <input type="radio"/> | <input type="radio"/> | Strongly agree |

15. **I know enough now to prescribe buprenorphine in the primary care setting.**

Mark only one oval.

|                   |                       |                       |                       |                       |                       |                |
|-------------------|-----------------------|-----------------------|-----------------------|-----------------------|-----------------------|----------------|
|                   | 1                     | 2                     | 3                     | 4                     | 5                     |                |
| Strongly disagree | <input type="radio"/> | <input type="radio"/> | <input type="radio"/> | <input type="radio"/> | <input type="radio"/> | Strongly agree |

16. **I would prescribe buprenorphine to patients with opioid use disorder if I were given proper training and support.**

Mark only one oval.

- 1 - Strongly disagree
- 2
- 3 - Neutral
- 4
- 5 - Strongly agree
- I already prescribe buprenorphine to outpatients with opioid use disorder.
